# Supplementary material for: Bone-targeting carbon dots: effect of nitrogen-doping on binding affinity
Source: Royal Society of Chemistry journal article supplement (doi:10.1039/c8ra09729a), 2019-01-01
Supplement: c8ra09729a1.pdf [file c8ra09729a1.pdf]

## Supporting Information

# Bone-targeting carbon dots : effect of binding affinity by nitrogen-doping

Kyung Kwan Lee,<sup>§a,d</sup> Jae-Geun Lee,<sup>§b,c</sup> Chul Soon Park,<sup>e</sup> Sun Hyeok Lee,<sup>a,c</sup> Naren Raja,<sup>c,g</sup>  
Hui-suk Yun,<sup>c,g</sup> Jeong-Soo Lee<sup>\*b,c,f</sup> and Chang-Soo Lee<sup>\*a,c</sup>

<sup>a</sup>Hazards Monitoring BNT Research Center, Korea Research Institute of Bioscience and Biotechnology (KRIBB), Daejeon 34141, Republic of Korea

<sup>b</sup>Disease Target Structure Research Center, Korea Research Institute of Bioscience and Biotechnology (KRIBB), Daejeon, 34141, Republic of Korea

<sup>c</sup>Department of Biotechnology, University of Science & Technology (UST), Daejeon 34113, Republic of Korea

<sup>d</sup>Department of Chemical Engineering and Applied Chemistry, Chungnam National University, Daejeon 34134, Republic of Korea

<sup>e</sup>Department of Polymer Engineering, Chonnam National University, Gwangju 61186, Republic of Korea

<sup>f</sup>Dementia DTC R&D Convergence Program, Korea Institute of Science and Technology (KIST), Seoul 02792, Republic of Korea

<sup>g</sup>Powder and Ceramics Division, Korea Institute of Materials Science (KIMS), Changwon 51508, Republic of Korea

§ The authors contributed equally to this work.

\* Corresponding author: (J.-S.L.) [jslee@kribb.re.kr](mailto:jslee@kribb.re.kr); (C.-S.L.) [cslee@kribb.re.kr](mailto:cslee@kribb.re.kr)

**Table S1** Reaction conditions and optical characterization for carbon dots (CDs).

|          | Reaction reagents             |                       |          | UV lamp images in DW (at 365 nm)                                                    |                                                                                     | Excitation (nm) | Emission (nm) | Product                                                                               |
|----------|-------------------------------|-----------------------|----------|-------------------------------------------------------------------------------------|-------------------------------------------------------------------------------------|-----------------|---------------|---------------------------------------------------------------------------------------|
|          | Alendronate sodium trihydrate | Ethylenediamine (EDA) | DI-water | Vis/UV                                                                              |                                                                                     |                 |               |                                                                                       |
| <b>a</b> | 1.0014 g                      | 0 $\mu$ L             | 40 mL    |    |    | 330             | 410           |    |
| <b>b</b> | 1.0026 g                      | 335 $\mu$ L           | 40 mL    |    |    | 340             | 405           |    |
| <b>c</b> | 1.0020 g                      | 500 $\mu$ L           | 40 mL    |    |    | 330             | 400           |    |
| <b>d</b> | 1.0031 g                      | 1000 $\mu$ L          | 40 mL    |   |   | 320             | 400           |   |
| <b>e</b> | 1.0017 g                      | 2000 $\mu$ L          | 40 mL    |  |  | 295             | 395           |  |

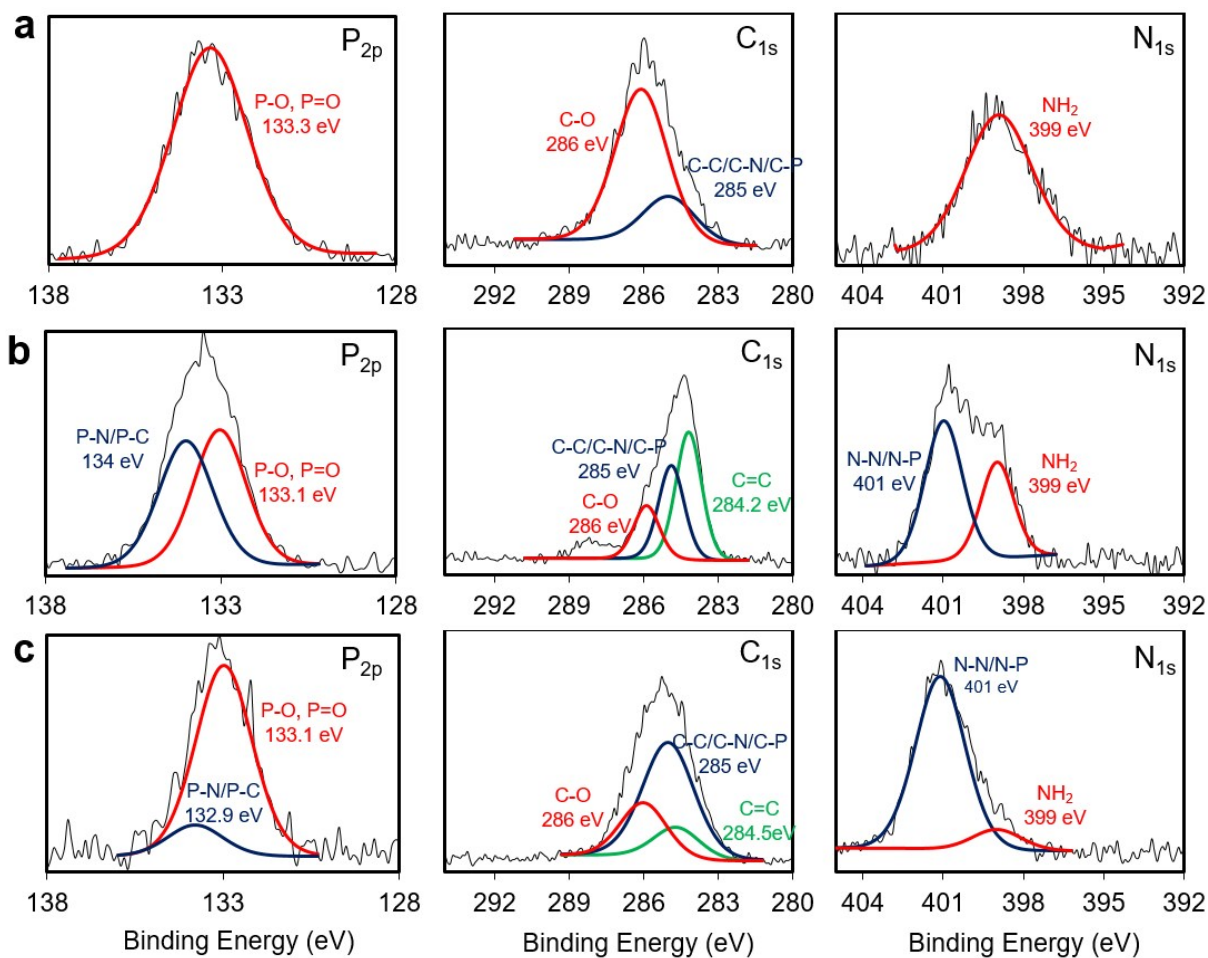

**Fig. S1** X-ray photon spectroscopy (XPS) analysis of a) Alendronate, b) Alen-EDA-CDs, and c) Alen-CDs.

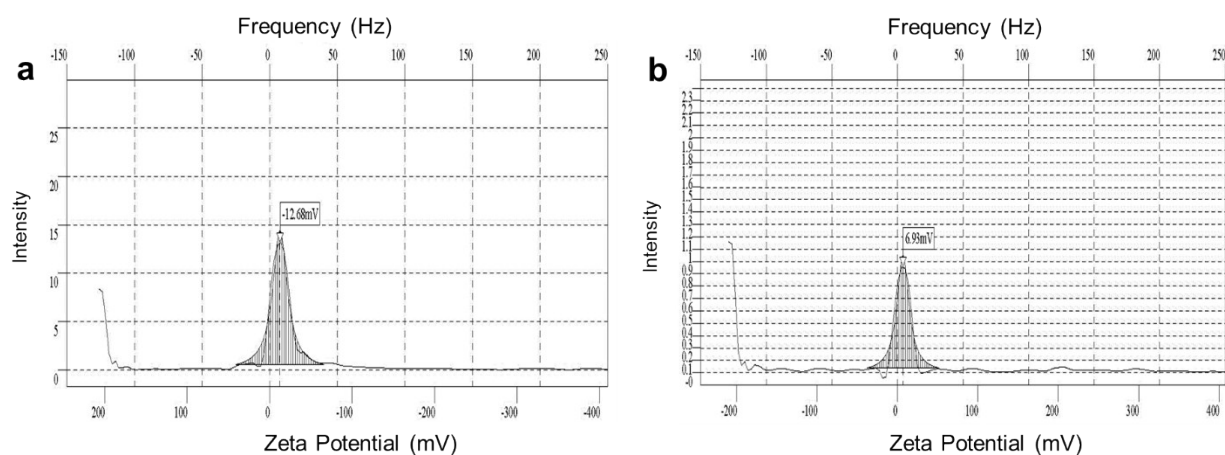

**Fig. S2** Distribution of mobility analysis of a) Alen-CDs and b) Alen-EDA-CDs using zeta potential (n=5).

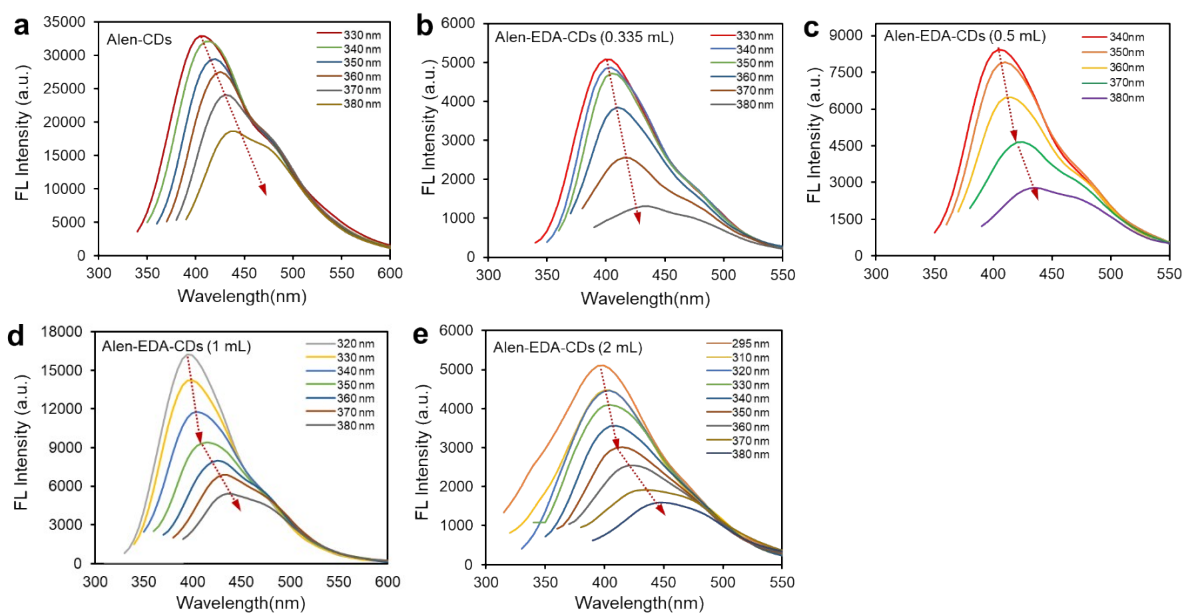

**Fig. S3** Excitation dependence of fluorescence spectrum of a) Alen-CDs and Alen-EDA-CDs doped with EDA at b) 0.335 mL, c) 0.5 mL, d) 1 mL and, e) 2 mL.

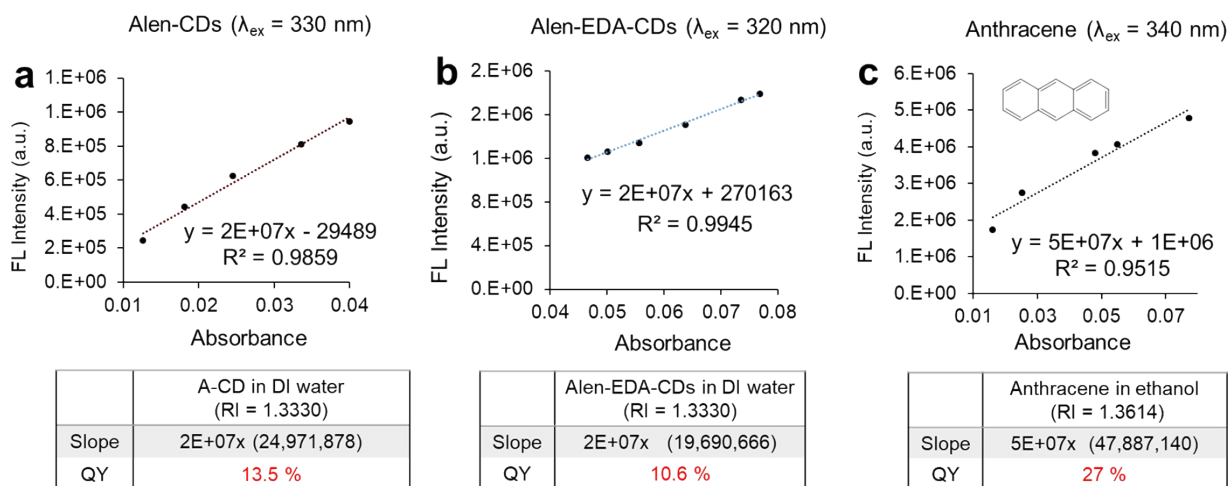

**Fig. S4** Quantum yield of a) Alen-CDs, b) Alen-EDA-CDs, and c) anthracene as a relative reference fluorophore.

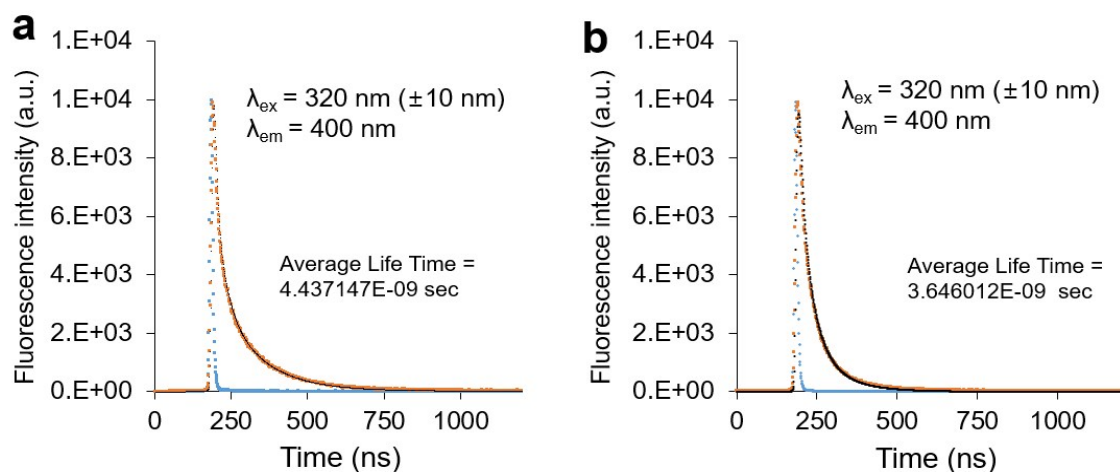

**Fig. S5** Fluorescence decay profiles of a) Alen-CDs and b) Alen-EDA-CDs at 320 nm excitation and 400 nm emission.

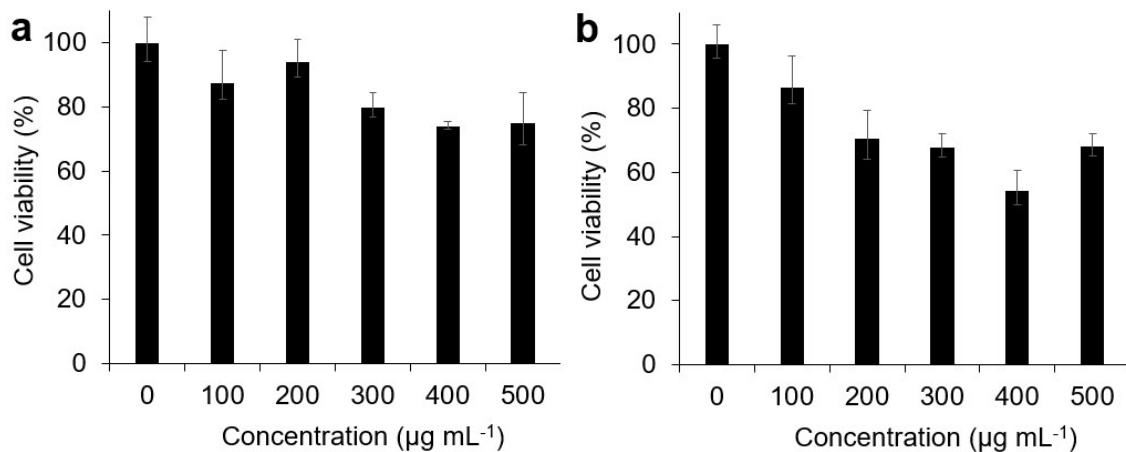

**Fig. S6** Cells viability on HeLa cell of a) Alen-CDs and b) Alen-EDA-CDs (n=5).

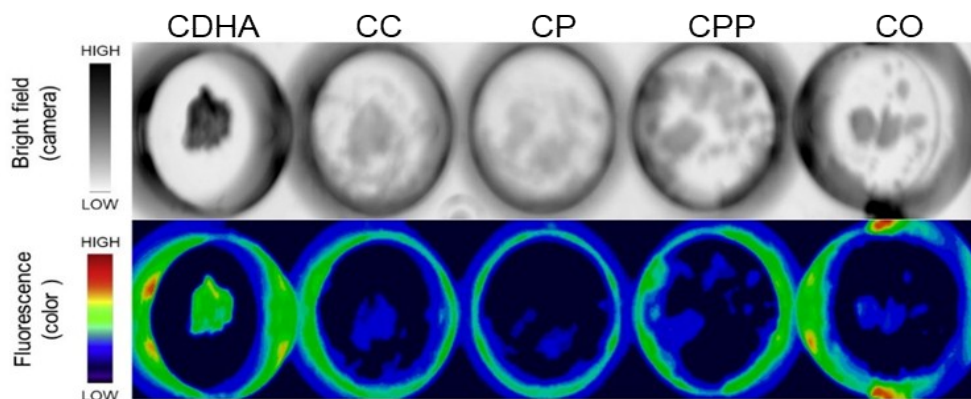

**Fig. S7** Specific affinity of Alen-CDs for calcium deficient hydroxyapatite (CDHA), calcium carbonate (CC), calcium phosphate (CP), calcium pyrophosphate (CPP), and calcium oxalate (CO).

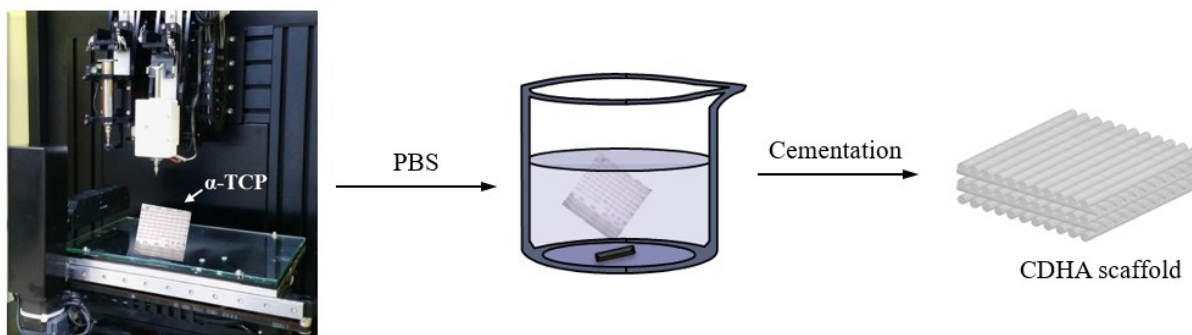

**Fig. S8** Schematic diagrams of CDHA scaffold fabrication.

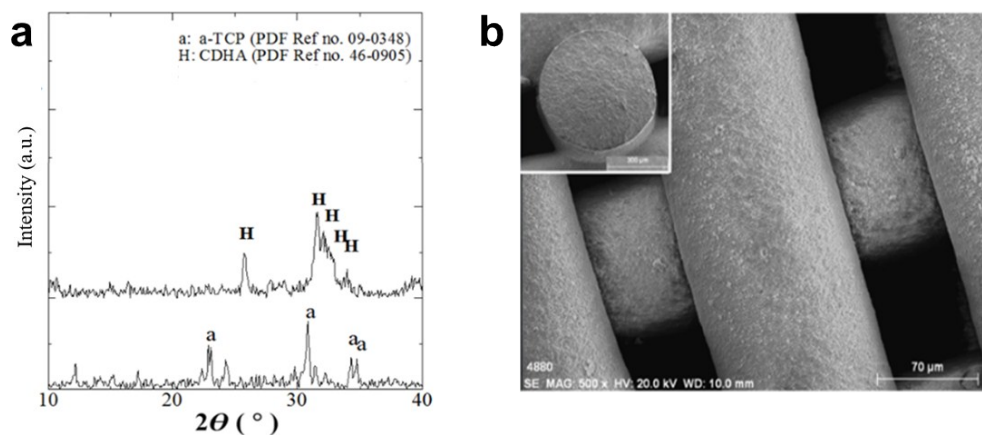

**Fig. S9** a) XRD result of  $\alpha$ -TCP scaffold (before cementation) and CDHA scaffold (after cementation), and b) SEM image of CDHA scaffold (insert is closed section).



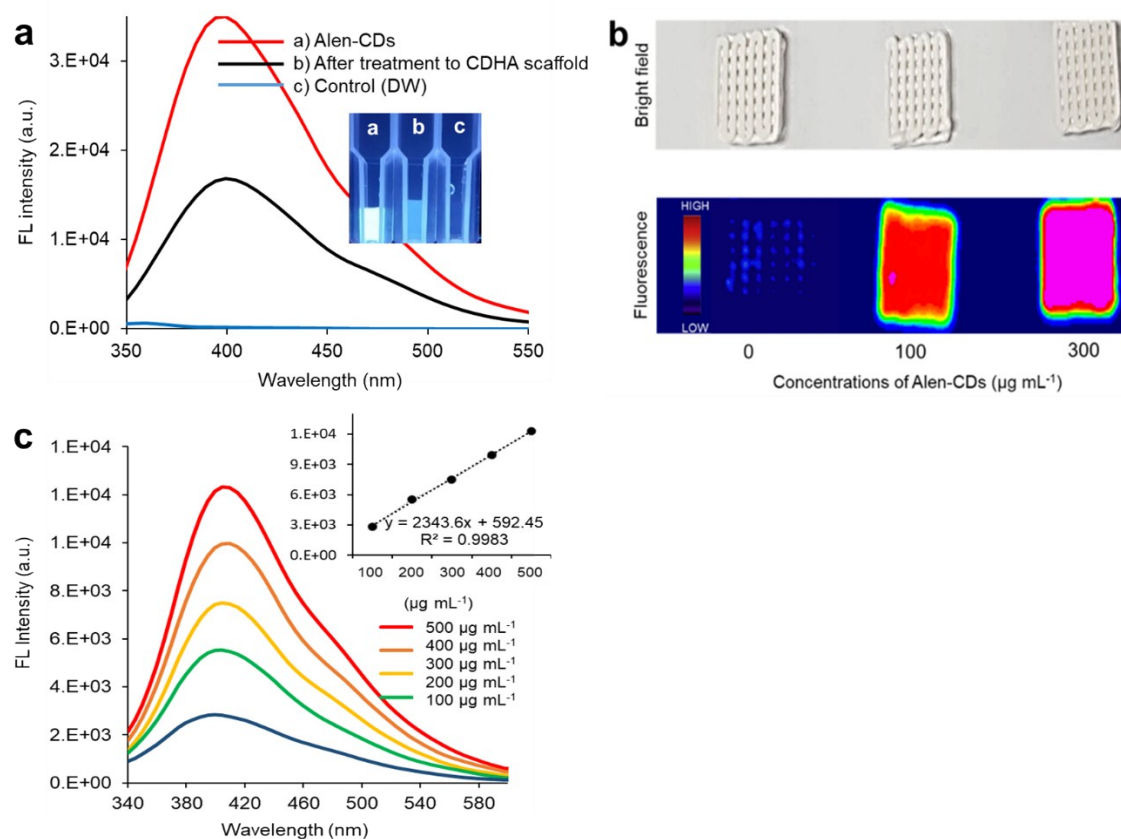

**Fig. S10** a) Fluorescence spectrum and images of Alen-CDs solutions (before and after adsorption), b) fluorescence images of Alen-CDs treated scaffolds at different concentrations (0, 100, 300  $\mu\text{g mL}^{-1}$ ), and c) calibration curve for emission spectrum of Alen-CDs treated scaffolds at different concentrations (100–500  $\mu\text{g mL}^{-1}$ ).

**Table. S2** EDAX analysis of CDHA scaffold a) before and b) after Alen-CDs treatment.

| Before Alen-CDs treatment |         |          | After Alen-CDs treatment |          |         |          |          |
|---------------------------|---------|----------|--------------------------|----------|---------|----------|----------|
| <b>a</b>                  | Element | Weight % | Atomic %                 | <b>b</b> | Element | Weight % | Atomic % |
|                           | O       | 15.57    | 29.75                    |          | C       | 11.26    | 18.50    |
|                           | P       | 26.11    | 25.77                    |          | N       | 2.18     | 3.07     |
|                           | Ca      | 58.31    | 44.48                    |          | O       | 45.19    | 55.73    |
|                           | Totals  | 100.00   |                          |          | P       | 16.13    | 10.27    |
|                           |         |          |                          |          | Ca      | 25.25    | 12.43    |
|                           |         |          | Totals                   | 100.00   |         |          |          |
